# Supplementary material for: Techno-economic analysis of a solar-driven biomass pyrolysis plant for bio-oil and biochar production
Source: Royal Society of Chemistry journal article supplement (doi:10.1039/d4se00450g), 2024-01-01
Supplement: d4se00450g1.pdf [file d4se00450g1.pdf]

## Supplementary information

### SI. Section 1: Modelling of Pyrolysis plants

Ashes composition is taken from the Aspen database. Bio-oil and gaseous products of biomass pyrolysis are very complex combinations of several compounds and it is not possible to identify them easily. Therefore, it is decided to choose a selected group of compounds based on previous studies on woody biomass pyrolysis: the compound species are simplified by merging one or more species of the same specific class to reduce the number of total compounds and complexity of the pyrolysis model [29]. The species are selected from those available in the Aspen Plus database, therefore thermochemical properties of the selected compounds might be slightly different from the study performed by NREL [29]. SI Table 1 describes the details of species involved in the model.

However, few species are not present in the database of Aspen Plus and these compounds belong to high molecular weight lignin A ( $\beta$ -O-4 oligomeric compounds) and lignin B (phenyl-coumaranic compounds). To overcome this problem, thermochemical properties of these compounds are entered manually in the Aspen plus model using the values taken from literature [29].

SI Table 1: Species present in bio-oil composition

| Compound                              | Modeled specie                    | Formula              |
|---------------------------------------|-----------------------------------|----------------------|
| Water insoluble                       |                                   |                      |
| high molar weight lignin A components | $\beta$ -O-4 oligomeric compounds | $C_{20}H_{26}O_8$    |
| Low molar weight lignin A components  | Dimethoxy stilbene                | $C_{16}H_{16}O_2$    |
| Sulphate compounds                    | Dibenzothiophene                  | $C_{12}H_8S$         |
| high molar weight lignin B components | Phenyl-coumaran compounds         | $C_{21}H_{26}O_8$    |
| low molar weight lignin B components  | Dibenzofuran                      | $C_{12}H_8O$         |
| Extracts                              | Dehydroabietic acid               | $C_{20}H_{28}O_2$    |
| Nitrogen compounds                    | 2,4,6-trimethylpyridine           | $C_8H_{11}N$         |
| Water soluble                         |                                   |                      |
| Alcohols                              | 1,4-Benzenediol                   | $C_6H_6O_2$          |
| Acids                                 | Crotonic acid                     | $C_4H_6O_2$          |
| Aldehydes                             | 3-Methoxy-4-Hydroxybenzaldehyde   | $C_8H_8O_3$          |
| Ketones                               | Acetol (Hydroxyacetone)           | $C_3H_6O_2$          |
| Guaiacol                              | Isoeugenol                        | $C_{10}H_{12}O_2$    |
| High molecular weight sugars          | Cellobiose                        | $C_{12}H_{22}O_{11}$ |
| Low molecular weight sugars           | Levogluconan                      | $C_6H_{10}O_5$       |

Solid species such as sulfur, carbon, bauxite and sand (pure  $SiO_2$ ) are assumed as conventional solids and their thermochemical and structural composition is already defined in Aspen database. Properties of biomass and ashes are introduced in Aspen Plus according to the data in SI Table 2.

The thermodynamic properties of all gaseous and liquid species in the model are simulated in Aspen Plus using RSK-BM (Redlich-Kwong-Soave equation with Boston-Matias) function. This method is recommended by Aspen for process modeling of petrochemical applications, refinery processes and gaseous species e.g. ethylene plants and gas plants [30]. . Auxiliaries are considered the 0.8% of the heat exchanged at all components [55].

SI Table 2: Properties of unconventional components defined in Aspen model

**Ashes**

**Biomass**

| Property                   | Calculation method                | Code      | Calculation method                    | Code      |
|----------------------------|-----------------------------------|-----------|---------------------------------------|-----------|
| Specific heat              | Cubic correlation                 | 2 (CP2C)  | Modified correlation for biomass [33] | 1 (CP1C)  |
| Standard heat of formation | From heat of combustion           | 1         | From heat of combustion               | 1         |
| Basis of enthalpy          | Standard value at 298.2 K & 1 bar | 1         | Standard value at 298.2 K & 1 bar     | 1         |
| Heat of combustion         | BOIE correlation standard         | 1 (BOIEC) | HHV on dry bases (user-defined)       | 6 (HCOMB) |

SI Table 3: Assumptions of dryer section used in modeling [29]

| Parameters assumed              | Stream | Value     |
|---------------------------------|--------|-----------|
| Inlet gas pressure              | 16     | 1.15 bar  |
| O <sub>2</sub> content in gases | 16     | < 10% mol |
| Outlet gas pressure             | 17     | 1.08 bar  |
| Temperature of air              | 25     | 32.2 °C   |
| Moisture in biomass at outlet   | 02     | 10%       |

SI Table 4: Assumption used in pyrolysis reactor modeling

| Parameter assumed                           | Value                          |
|---------------------------------------------|--------------------------------|
| Pyrolyzer outlet pressure                   | 1.22 bar                       |
| Pyrolyzer outlet temperature                | 434°C                          |
| Biomass conversion                          | 100%                           |
| PHC to dry biomass mass ratio               | 14.5                           |
| Thermal losses of pyrolyzer                 | 1% of Biomass Q <sub>LHV</sub> |
| Fluidization gas flow to biomass mass ratio | 3                              |

SI Table 5: Assumptions used in bio-oil recovery modeling

| Parameters                                                | Stream/Component | Value        |
|-----------------------------------------------------------|------------------|--------------|
| Gas flow temperature after quenching                      | 10               | 45°C         |
| Pressure after quenching                                  | 10               | 1.24 bar     |
| Temperature of volatiles leaving 1 <sup>st</sup> quencher | 9                | 70°C         |
| Compression ratio                                         | Compressor       | 1.59         |
| Solid filter removal efficiency                           | Quencher         | 100%         |
| Bio-oil filter leak                                       | Quencher         | 3% by weight |
| Compressor electro-mechanical efficiency                  | Compressor       | 90%          |
| Compressor isentropic efficiency                          | Compressor       | 72%          |
| Oil outlet temperature                                    | 07               | 54°C         |

|                                   |          |     |
|-----------------------------------|----------|-----|
| Percentage gas share to combustor | Splitter | 2%  |
| Percentage gas share to pyrolyzer | Splitter | 96% |

SI Table 6: Assumptions used in combustion section modeling

| Parameters                    | Stream/Component | Value                |
|-------------------------------|------------------|----------------------|
| Combustor outlet temperature  | 18-19            | 609 °C               |
| Excess air                    | Combustor        | 25%                  |
| Thermal loss                  | Combustor        | 1% Biomass $Q_{LHV}$ |
| Compression ratio             | Compressor-2     | 1.43                 |
| Ash removal filter efficiency | SEP-02           | 100%                 |
| PHC removal filter efficiency | SEP-01           | 100%                 |

SI Table 7: Parameters used in CSP based modeling based on changes made in conventional pyrolysis model

| Parameters                                             | Stream/Component | Value                     |
|--------------------------------------------------------|------------------|---------------------------|
| PHC-char separation efficiency                         | Solid separator  | 100%                      |
| Char by-product $kg_{char}/kg_{fixedC}$                | Biochar          | 1.2                       |
| Sludge by-product $kg_{Sludge}/kg_{fixedC}$            | Sludge           | 2.6                       |
| Temperature difference at receiver and reactor outlets | CSP/PYRO         | 175 °C                    |
| PHC temperature at pyrolyzer inlet                     | CSP              | 609 °C                    |
| PHC types used in model                                | CSP              | Sand/CARBO ACCUCAST ID 50 |

## SI. Section 2: Model validation with reference case

### Model validation

Model results are compared to the ones obtained by Jones et al. [29]. The product comparison in SI Table 8 illustrates the elemental compositions of different products, which is consistent with Jones et al. [29], therefore the model developed in this work can be considered satisfactory. However, the calorific values (HHV) of the oil and char are slightly higher due to different thermal properties of species in Aspen libraries and database (see section 2.2).

SI Table 8: The product compositions and its comparison with literature

| Product | Compound or property         | Jones et al. [29] | This study |
|---------|------------------------------|-------------------|------------|
| Bio-oil | Mass fraction of dry biomass | 64%               | 64.09%     |
|         | Carbon                       | 56.61%            | 56.61%     |
|         | Hydrogen                     | 6.61%             | 6.61%      |
|         | Oxygen                       | 36.77%            | 36.78%     |
|         | HHV (MJ/kg)                  | 16.9              | 17.56      |

|                |                              |       |       |
|----------------|------------------------------|-------|-------|
| Reaction water | Mass fraction of dry biomass | 12%   | 12%   |
| Gases          | Mass fraction of dry biomass | 12%   | 12%   |
|                | CO                           | 46%   | 46.1% |
|                | CO <sub>2</sub>              | 43%   | 43.5% |
|                | CH <sub>4</sub>              | 6%    | 6.1%  |
|                | C <sub>2</sub> <sup>+</sup>  | 5%    | 4.2%  |
|                | H <sub>2</sub>               | <1%   | 0.03% |
| Char & Ash     | Mass fraction of dry biomass | 12%   | 12%   |
|                | Ash                          | 7.69% | 7.6%  |
|                | Carbon                       | 83.2% | 82.8% |
|                | Hydrogen                     | 1.14% | 1.67% |
|                | Oxygen                       | 6.58% | 6.54% |
|                | Nitrogen                     | 1.37% | 1.37% |
|                | HHV (MJ/kg)                  | 28.81 | 29.6  |

#### SI. Section 3: Physical properties of PHC

Two types of PHC material Accucast ID 15 and Sand are used for CSP plant modelling. The physical properties of PHC assumed during CSP modeling are provided below.

SI Table 9: PHC physical properties

| Properties                   | ACCUCAST ID 50       | SAND  | References |
|------------------------------|----------------------|-------|------------|
| Solar absorptivity (-)       | 0.906                | 0.550 | [56], [57] |
| Thermal emissivity (-)       | 0.754                | 0.715 | [56]       |
| Density (kg/m <sup>3</sup> ) | 3300                 | 2650  | [56], [58] |
| Specific heat (J/kgK)        | $365 \cdot T^{0.18}$ | 1000  | [57], [58] |
| Diameter (μm)                | 280                  | 280   | [57], [58] |

#### SI. Section 4: Economic assumption and breakdown of costs.

In economic analysis some assumptions were considered which are described below. Moreover, the detailed description and break down of fix cost, fixed variable cost and variable operation cost of pyrolysis plant are described. The correlation used and economic parameters used for CSP plant economic analysis are also given in this section.

Towler & Sinnott correlation [59] (equation SI-1) is used to estimate the purchase cost of cylindrical combustor/furnace based on required heat duty ( $D$ ) for both solid char and gas combustors. In this equation  $a$  and  $b$  are constant having value of 80000 and 109000 respectively while  $n$  is the exponent factor equal to 0.8. This cost is scaled according to selected year of 2019 using  $CEPCI_{2019}$ .

$$C_p = a + bD^n \quad (\text{SI-1})$$

SI Table 10: Economic assumptions

| Description                            | Value assumed                                                                                                            |
|----------------------------------------|--------------------------------------------------------------------------------------------------------------------------|
| Discount rate ( <i>i</i> ) (DR)        | 10%                                                                                                                      |
| Investment finance with debt/equity    | 60% / 40%                                                                                                                |
| Debt interest rate                     | 8% per year                                                                                                              |
| Debt financing term                    | 10 years                                                                                                                 |
| Plant's useful life                    | 30 years                                                                                                                 |
| Taxes on profits                       | 35%                                                                                                                      |
| Working capital cost                   | 5% of the FCI                                                                                                            |
| Capital amortization                   | 7 years according to the MACRS program                                                                                   |
| Duration of construction               | 3 years (8% for the first year, 60% for the second and 32% for the third year)                                           |
| Duration of start-up                   | 6 months                                                                                                                 |
| Costs during the start-up and revenues | Variable costs: 75% of the nominal value<br>Fixed costs: 100% of the nominal value<br>Revenues: 50% of the nominal value |
| Euro to USD exchange rate              | 1.09                                                                                                                     |

SI Table 11: Reference year price index and direct cost in 2019 of the various components of the plant without CSP and hybrid

| Components                                 | Ref. year | CEPCI | $C_x$ (TPC)<br>€M in 2019 | $f$<br>installation | $C_{inst}$ (TIC)<br>M€ in 2019<br>(Conventional) | $C_{inst}$ (TIC) M€<br>in 2019<br>(CSP based) | $C_{inst}$ (TIC)<br>M€ in 2019<br>(Hybrid) |
|--------------------------------------------|-----------|-------|---------------------------|---------------------|--------------------------------------------------|-----------------------------------------------|--------------------------------------------|
| Plant (Pyrolizer, and oil recovery system) | 2009      | 521.9 | 3.18                      | 2.7                 | 8.53                                             | 8.53                                          | 8.53                                       |
| Solid char combustor                       | 2010      | 550.8 | 0.31                      | 3.0                 | 0.94                                             | -                                             | 0.94                                       |
| Gas combustor                              | 2010      | 550.8 | 0.16                      | 3.0                 | -                                                | 0.48                                          | 0.48                                       |
| Biomass pretreatment                       | 2005      | 468.2 | 0.50                      | 2.47                | 1.24                                             | 1.24                                          | 1.24                                       |
| Utilities and auxiliaries                  | 2005      | 468.2 | 0.17                      | 2.93                | 0.48                                             | 0.48                                          | 0.48                                       |
| <b>Total</b>                               |           |       | -                         | -                   | <b>11.19</b>                                     | <b>10.78</b>                                  | <b>11.67</b>                               |

SI Table 12 shows the breakdown of total capital investment (TCI) for the pyrolysis plant in its basic configuration working without a CSP section.

SI Table 12: The breakdown of the total capital investment of the pyrolysis plant with basic configurations

Conventional M€    CSP based M€    Hybrid M€

|                                       |                            |              |       |       |
|---------------------------------------|----------------------------|--------------|-------|-------|
| <b>Total purchase cost (TPC)</b>      |                            | 4.16         | 4.01  | 4.32  |
| <b>Total Installed cost (TIC)</b>     |                            | 11.19        | 11.42 | 11.84 |
| <b>Other direct costs</b>             | Assumptions/Considerations |              |       |       |
| Material stock up                     | 4% of TPCs                 | 0.17         | 0.16  | 0.17  |
| Additional components                 | 4.5% of TPCs               | 0.19         | 0.18  | 0.19  |
| Site development                      | 10% of TPCs                | 0.42         | 0.40  | 0.43  |
| <b>Land cost</b>                      |                            | 0.10         | 0.10  | 0.10  |
| <b>Total direct costs (TDC)</b>       |                            | 12.05        | 11.57 | 12.56 |
| <b>Indirect costs</b>                 | 60% of the TDC             | 7.23         | 6.94  | 7.54  |
| <b>Total fixed capital (FCI)</b>      |                            | <b>19.29</b> | 18.51 | 20.10 |
| Working capital                       | 5% of the mutual funds     | 0.96         | 0.93  | 1.01  |
| <b>Total capital investment (TCI)</b> |                            | <b>20.25</b> | 19.43 | 21.11 |

SI Table 13: CSP cost parameters and factor

| Parameter                                                                | Value | Reference |
|--------------------------------------------------------------------------|-------|-----------|
| Land specific cost $c_{land}$ (€/m <sup>2</sup> )                        | 1.75  | [47]      |
| Heliostat specific costs $c_{hel}$ (€/m <sup>2</sup> )                   | 133   | [31]      |
| Heliostat field preparation costs $c_{field,prep}$ (€/m <sup>2</sup> )   | 14.67 | [31]      |
| Receiver specific cost $c_{rec}$ (€/m <sup>2</sup> )                     | 34312 | [41]      |
| Tower specific costs $c_{tow}$ (€/m <sup>1.9274</sup> )                  | 148.4 | [37]      |
| Thermal Energy Storage (TES) specific cost $c_{TES}$ (€/m <sup>2</sup> ) | 1000  | [60]      |
| Particles specific cost $c_{particles}$ (€/kg)                           | 1.4   | [35]      |
| Particle elevator specific cost $c_{elevator}$ (€/s·m·kg)                | 53.55 | [41]      |
| Contingencies factor $f_{contingencies}$                                 | 7%    | [61]      |
| Construction factor $f_{construction}$                                   | 13%   | [61]      |

SI Table 14 summarizes the breakdown of costs of optimized plant components for both hybrid and CSP based.

SI Table 14: CSP cost correlations and final cost of components for optimized case

| Component | Correlation | CSP | Hybrid | Reference |
|-----------|-------------|-----|--------|-----------|
|-----------|-------------|-----|--------|-----------|

|                                |                                                                                                                | (M€) | (M€) |      |
|--------------------------------|----------------------------------------------------------------------------------------------------------------|------|------|------|
| Heliostat field                | $C_{hel,field} = (c_{hel} + c_{field,prep}) \cdot A_{hel}$                                                     | 3.32 | 2.35 | [41] |
| Receiver                       | $C_{rec} = c_{rec} \cdot A_{aperture}$                                                                         | 0.69 | 0.49 | [41] |
| Tower                          | $C_{tow} = c_{tow} \cdot H_{tow,opt}^{1.9274}$                                                                 | 0.20 | 0.15 | [37] |
| Thermal Energy Storage (TES)   | $C_{TES,hot/cold} = c_{TES} \cdot \left(1 + 0.3 \cdot \frac{T_{TES,hot/cold} - 600}{400}\right) \cdot A_{TES}$ | 0.72 | 0.68 | [60] |
| Particles                      | $C_{particles} = 1.1 \cdot c_{particles} \cdot m_{particles}$                                                  | 0.04 | 0.04 | [37] |
| Particle elevator              | $C_{elevator} = c_{elevator} \cdot H_{elevator} \cdot \dot{m}_{particles}$                                     | 0.16 | 0.09 | [41] |
| Fixed capital investment       | $FCI = C_{hel,field} + C_{rec} + C_{tow} + C_{TES,hot/cold} + C_{particles} + C_{elevator}$                    | 5.14 | 3.82 | -    |
| Total direct cost              | $C_{direct} = (1 + f_{contingencies}) \cdot FCI$                                                               | 5.50 | 4.1  | [41] |
| Land Cost                      | $C_{Land} = c_{land} \cdot A_{Land/m2}$                                                                        | 0.3  | 0.2  | [29] |
| Total Indirect cost            | $C_{indirect} = (f_{construction} \cdot C_{direct}) + C_{Land}$                                                | 1.01 | 0.73 | [41] |
| Total Capital investment (TCI) | $C_{Total} = C_{direct} + C_{indirect}$                                                                        | 6.51 | 4.8  | [41] |

The number of employees is assumed on two factors: the size of the plant and the day considered to have three shifts. Contrarily, the wages are obtained from the literature with respect to 2011 and scaled up for the reference year 2019 using the indices from American Bureau of Labor Statistics Data [62], where the reported salary indices in 2011 and 2019 are 21.46 and 25.46 respectively. Moreover, employee benefits are also taken into account along with their respective costs assuming to be equal to 90% of the total salaries, while 0.7% of the mutual fund is estimated for the expenses for taxes and insurance whereas, the maintenance costs are assumed to 3% of the total FCI. SI Table 17 illustrates the breakdown of fixed operation cost and assumptions.

SI Table 15: Variable operating costs in pyrolysis plant

| Commodities                          | Consumption            | specific cost          | Cost €/h | Annual cost €/y |
|--------------------------------------|------------------------|------------------------|----------|-----------------|
| Biomass                              | 54.7 ton/d             | 17.05 €/t              | 35.5     | 340,275         |
| Electricity                          | 374 kWh/h              | 0.06 €/kWh             | 23.7     | 207,395         |
| makeup water                         | 0.65 m <sup>3</sup> /h | 0.20 €/ m <sup>3</sup> | 0.1      | 1,149           |
| makeup PHC                           | 0.08 ton/d             | 45.3 €/ton             | 0.1      | 1,263           |
| Ash disposal                         | 2.3 ton/d              | 17 €/ton               | 1.6      | 13,983          |
| water disposal                       | 0.48 gpm               | 0.03 €                 | 0.7      | 6,944           |
| <b>Total variable operative cost</b> |                        |                        |          | 571,009         |

SI Table 16: Number of staffs hired and wages

| Job                     | Positions | Specific salary, €/y | Wages, €/y |
|-------------------------|-----------|----------------------|------------|
| Plant engineer          | 1         | 83,594               | 83,594     |
| maintenance supervisor  | 1         | 68,138               | 68,138     |
| Operation supervisor    | 2         | 57,362               | 114,725    |
| Laboratory technician   | 1         | 47,784               | 47,784     |
| maintenance technician  | 2         | 47,784               | 95,568     |
| Turn operators          | 6         | 57,362               | 344,174    |
| construction site clerk | 3         | 33,416               | 100,248    |

|                       |           |        |                |
|-----------------------|-----------|--------|----------------|
| Administrative clerk  | 1         | 42,995 | 42,995         |
| <b>Total Salaries</b> | <b>17</b> |        | <b>897,226</b> |

SI Table 17: Fixed operating cost of pyrolysis plant

| Entities                    | Assumptions/Considerations | Conventional<br>M€/y | CSP based<br>M€/y | Hybrid<br>M€/y |
|-----------------------------|----------------------------|----------------------|-------------------|----------------|
| Benefits and overhead       | 90% of total salaries      | 0.81                 | 0.81              | 0.81           |
| maintenance                 | 3 % of FCI                 | 0.58                 | 0.56              | 0.60           |
| insurance & taxes           | 0.7% of FCI                | 0.13                 | 0.13              | 0.14           |
| <b>Total Salaries</b>       | -                          | <b>0.9</b>           | <b>0.9</b>        | <b>0.9</b>     |
| <b>Fixed Operation cost</b> | -                          | <b>2.42</b>          | <b>2.39</b>       | <b>2.45</b>    |

SI Table 18: The operational cost of solar plant for optimized CSP and hybrid cases

| Entities             | CSP-based Cost<br>€ | Hybrid pyrolysis<br>Cost € |
|----------------------|---------------------|----------------------------|
| O&M (annual)         | 130,267             | 96,448                     |
| Electricity (annual) | 4,038               | 2,481                      |
| Total Annual         | 134,305             | 98,929                     |

SI. Section 5: Additional results.

The detailed stream results of Conventional pyrolysis plant and CSP-based plant are provided below. Furthermore, the CSP plant capacity factor and CO<sub>2</sub> emissions with respect to SM<sub>T</sub> and storage sizes are shown in this section.

SI Table 19: Stream results of conventional biomass pyrolysis. Stream numbers refer to the schematic in Figure 2.

| Stream                                                      | T (°C) | P (bar) | Flow rate<br>(kg/s) | Composition (%wt) |     |      |      |      |     |      | Phase (mass basis) |       |        |
|-------------------------------------------------------------|--------|---------|---------------------|-------------------|-----|------|------|------|-----|------|--------------------|-------|--------|
|                                                             |        |         |                     | C                 | H   | O    | S    | N    | Ash | PHC  | Solid              | Vapor | Liquid |
| <b>Section 1 “biomass pretreatment”</b>                     |        |         |                     |                   |     |      |      |      |     |      |                    |       |        |
| Biomass                                                     | 20     | 1.013   | 0.814               | 35.7              | 7.6 | 56   | 0.02 | 0.1  | 0.6 | 0    | 1                  | -     | -      |
| 2                                                           | 71.7   | 1.013   | 0.633               | 45.8              | 6.6 | 46.6 | 0.03 | 0.2  | 0.8 | 0    | 1                  | -     | -      |
| 16                                                          | 345    | 1.15    | 1.78                | 4.3               | 0.4 | 24.9 | 0.01 | 70.4 | 0.0 | 0    | -                  | 1     | -      |
| 17                                                          | 71.7   | 1.013   | 1.96                | 3.9               | 1.4 | 30.9 | 0.01 | 63.8 | 0.0 | 0    | -                  | 1     | -      |
| 23                                                          | 482.4  | 1.42    | 1.19                | 6.4               | 0.5 | 24.9 | 0.01 | 67.8 | 0.4 | 0    | -                  | 1     | -      |
| 24                                                          | 47.4   | 1.15    | 0.59                | 0.01              | 0.2 | 24.6 | 0.00 | 74.3 | 0.9 | 0    | -                  | 1     | -      |
| <b>Section 2 &amp; 3 “Pyrolyzation &amp; solid removal”</b> |        |         |                     |                   |     |      |      |      |     |      |                    |       |        |
| 4                                                           | 433.8  | 1.22    | 10.6                | 9.1               | 0.8 | 12.1 | 0    | 0    | 0   | 77.9 | 0.78               | 0.22  | -      |
| 5                                                           | 433.8  | 1.22    | 8.33                | 0.7               | 0   | 0.1  | 0    | 0    | 0.1 | 99.2 | 0.99               | 0.001 | -      |
| 6                                                           | 433.8  | 1.22    | 2.27                | 40.1              | 3.5 | 56.5 | 0    | 0    | 0   | 0    | -                  | 1     | -      |
| 13                                                          | 72.3   | 1.59    | 1.71                | 39.6              | 2.3 | 58.1 | 0    | 0    | 0   | 0    | -                  | 1     | -      |
| 19                                                          | 608    | 1.42    | 8.26                | 0                 | 0   | 0    | 0    | 0    | 0   | 100  | 1                  | -     | -      |
| <b>Section 4 “Bio-oil Recovery”</b>                         |        |         |                     |                   |     |      |      |      |     |      |                    |       |        |
| 7                                                           | 54.4   | 1.24    | 0.5                 | 41.5              | 7.8 | 50.4 | 0    | 0.01 | 0.1 | 0.2  | 0.002              | -     | 0.99   |
| 8                                                           | 54.4   | 1.24    | 0.016               | 38.3              | 7.2 | 46.6 | 0    | 0    | 2.4 | 5.4  | 0.08               | -     | 0.92   |
| 9                                                           | 45     | 1.24    | 1.78                | 39.6              | 2.3 | 58.1 | 0    | 0    | 0   | 0    | -                  | 1     | -      |
| 11                                                          | 72.3   | 1.59    | 1.18                | 39.6              | 2.3 | 58.1 | 0    | 0    | 0   | 0    | -                  | 1     | -      |
| BIO-OIL                                                     | 54.4   | 1.24    | 0.48                | 41.6              | 7.8 | 50.6 | 0    | 0.01 | 0   | 0    | -                  | -     | 1      |
| 12                                                          | 72.3   | 1.59    | 0.04                | 39.6              | 2.3 | 58.1 | 0    | 0    | 0   | 0    | -                  | 1     | -      |
| <b>Section 5 “Combustion”</b>                               |        |         |                     |                   |     |      |      |      |     |      |                    |       |        |
| 18                                                          | 609    | 1.43    | 9.45                | 0.8               | 0.1 | 3.1  | 0    | 8.5  | 0.1 | 87.5 | 0.87               | 0.13  | -      |
| 20                                                          | 72.5   | 1.43    | 1.08                | 0                 | 0.2 | 24.8 | 0    | 75.0 | 0   | 0    | 0                  | 1     | -      |
| 21                                                          | 609    | 1.43    | 1.19                | 6.4               | 0.5 | 24.9 | 0.01 | 67.7 | 0.4 | 0.1  | 0.005              | 0.99  | -      |
| PHC-MK                                                      | 32.2   | 1.22    | 0.001               | 0                 | 0   | 0    | 0    | 0.0  | 0   | 100  | 1                  | -     | -      |



|     |     |      |       |   |   |   |   |     |      |      |   |   |   |
|-----|-----|------|-------|---|---|---|---|-----|------|------|---|---|---|
| Ash | 609 | 1.43 | 0.006 | 0 | 0 | 0 | 0 | 0.0 | 85.6 | 14.4 | 1 | - | - |
|-----|-----|------|-------|---|---|---|---|-----|------|------|---|---|---|

SI Table 20: Stream results of CSP-based biomass pyrolysis. Stream numbers refer to the schematic in Figure 3.

| Stream | T (°C) | P (bar) | Flow rate (kg/s) | Composition (%wt) |     |      |     |      |     |     | Phase (mass basis) |       |        |
|--------|--------|---------|------------------|-------------------|-----|------|-----|------|-----|-----|--------------------|-------|--------|
|        |        |         |                  | C                 | H   | O    | S   | N    | Ash | PHC | Solid              | Vapor | Liquid |
| 12     | 72.3   | 1.59    | 0.068            | 39.6              | 2.3 | 58   | 0   | 0    | 0   | 0   | -                  | 1     | -      |
| 16     | 453    | 1.51    | 1.09             | 2.5               | 0.1 | 25.7 | 0   | 71.7 | 0   | 0   | -                  | 1     | -      |
| 17     | 71.7   | 1.013   | 1.28             | 2.15              | 1.7 | 34.7 | 0   | 61.5 | 0   | 0   | -                  | 0.98  | 0.02   |
| 18     | 434    | 1.22    | 0.07             | 83.1              | 1.7 | 6.6  | 0.2 | 1.4  | 7.1 | 0   | 0.90               | 0.1   | -      |
| 19     | 434    | 1.22    | 8.26             | 0                 | 0   | 0    | 0   | 0    | 0   | 100 | 1                  | -     | -      |
| Sludge | 54.4   | 1.24    | 0.02             | 40.5              | 7.6 | 49.3 | 0   | 0    | 2.6 | 0   | 0.08               | -     | 0.92   |

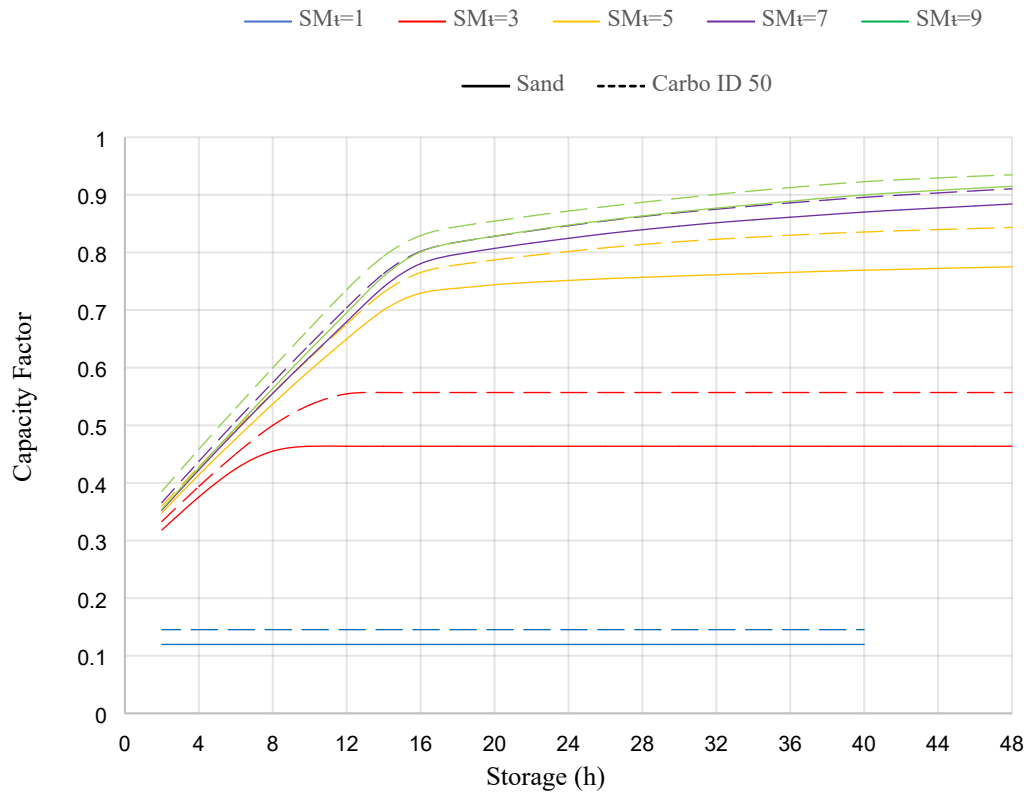

SI Figure 1: Capacity factor of the pyrolysis unit of the CSP-based plant as function on the SM<sub>T</sub> and storage size

For the CSP-based pyrolysis plant, also the energy usage efficiency is analyzed on yearly basis (see equation 4). Just like MFSP analysis, similar range of SM<sub>T</sub> and storage sizes are used to assess the energy usage efficiency and SI Figure 2 shows the trends. Energy usage efficiency is lower at bigger SM<sub>T</sub> and smaller storage sizes, while it increases quickly by increasing the size of storage. The smallest SM<sub>T</sub> have higher energy usage efficiency because they generate less solar thermal energy and even smaller storages can accommodate its excess energy, which can be used later. PHC type also affects this efficiency, Carbo ID50 has a lower power efficiency than sand at the same size of CSP plant because carbo ID50, generates more overall energy than sand at same size due to its higher thermal efficiency. During sunshine hours at the same SM<sub>T</sub> if storage is full, any excess of energy from CSP will be lost by defocusing. The power usage efficiency depends on how much energy is wasted therefore, the higher thermal efficiency of carbo ID50 allows the storage to fill up faster and the rest of the energy goes waste. The trends of energy usage efficiency for CSP-based and hybrid cases are the same.

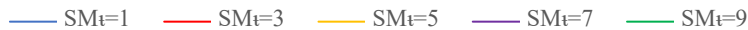

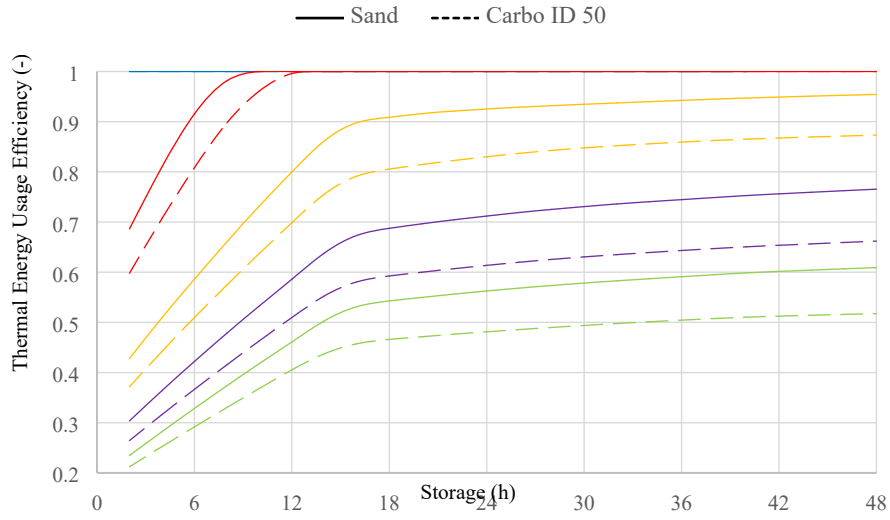

SI Figure 2: Hybrid and CSP based plant energy usage efficiency curves at various  $SM_T$  and storage sizes

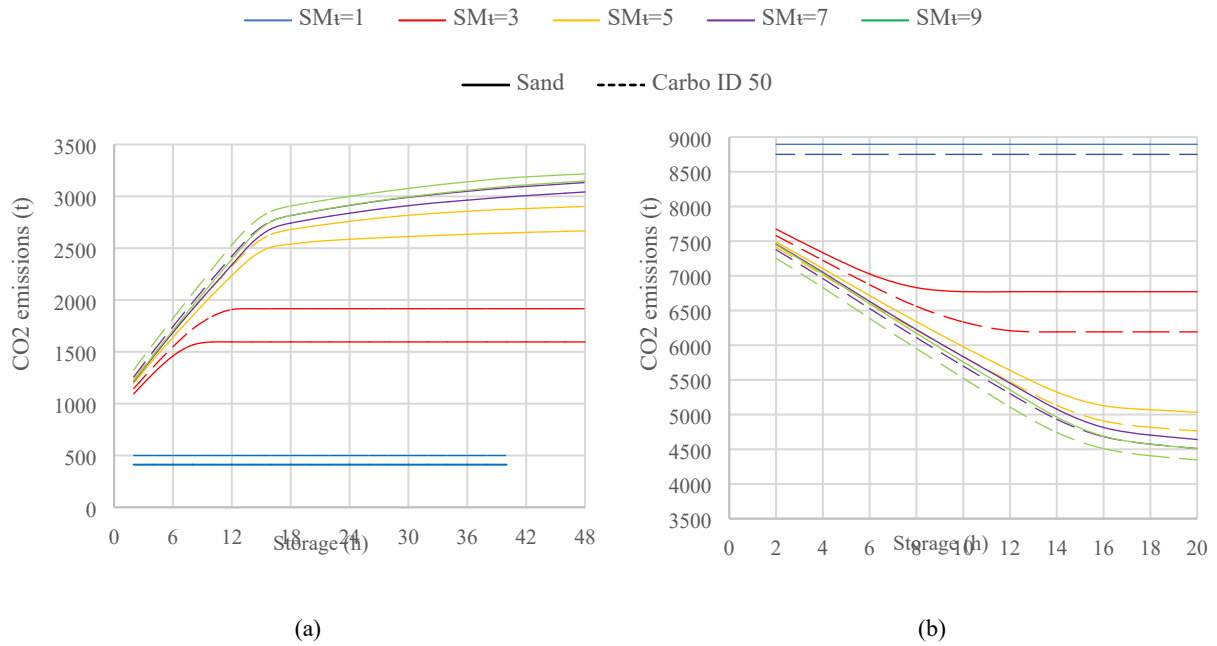

SI Figure 3: CO<sub>2</sub> emissions as function of  $SM_T$  and storage size in (a) CSP-based case and (b) hybrid case
